# Supplementary material
Source: PubMed Central journal article supplement (PMC4681575)
Supplement: NIHMS734396-supplement-Fig_1.pdf [file NIHMS734396-supplement-Fig_1.pdf]

# Supplemental Figure 1

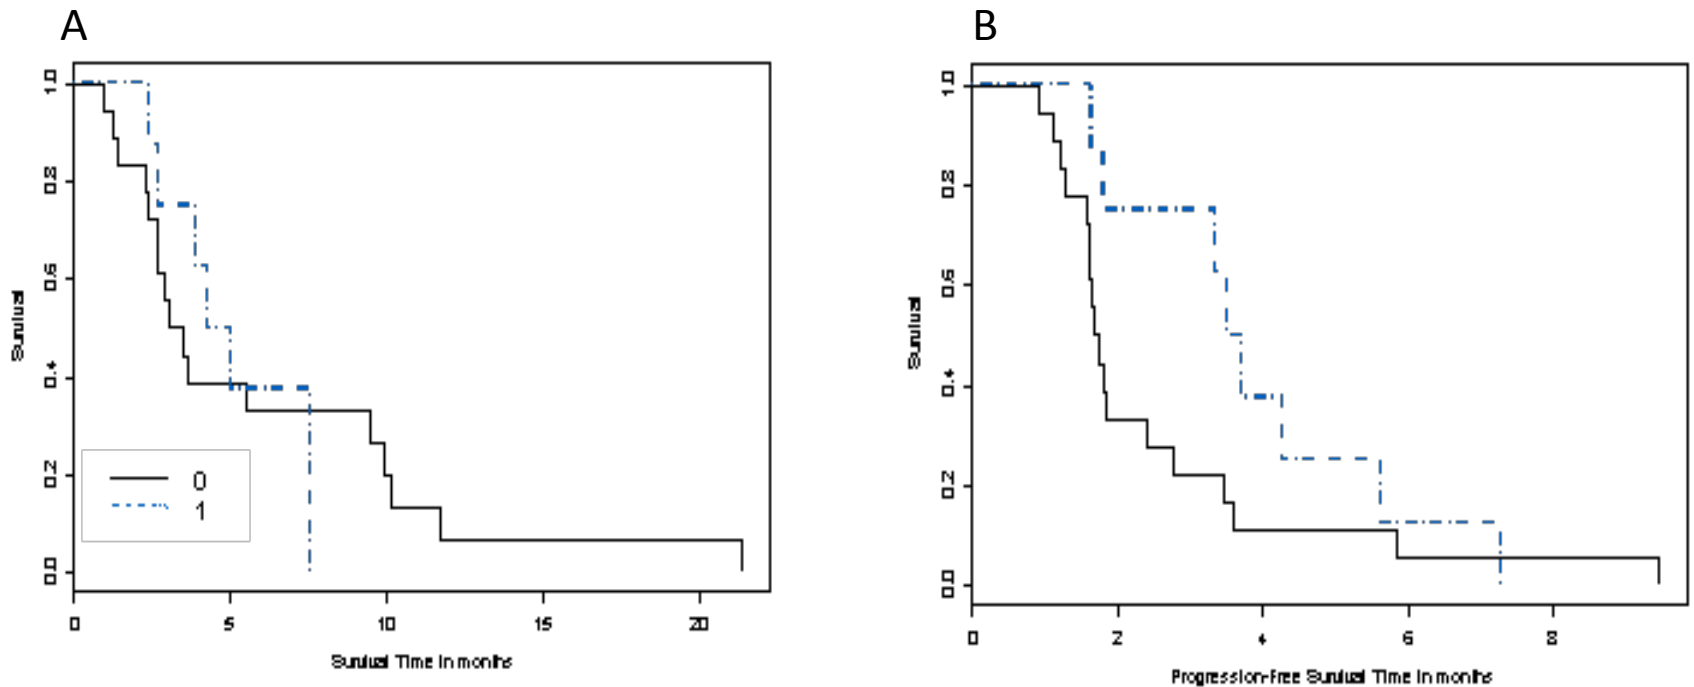

**Supplemental Figure 1.** The Kaplan-Meier Estimates of (A) Overall Survival and (B) Progression Free Survival for all patients on the study grouped by the availability of results for ex vivo ADCC (Ex vivo ADCC experiment performed (1) versus Ex vivo ADCC experiment not performed(0)).
