# Supplementary material
Source: PubMed Central journal article supplement (PMC4681575)
Supplement: NIHMS734396-supplement-Table_1.pdf [file NIHMS734396-supplement-Table_1.pdf]

Estimated Parameters for OS and PFS

| Estimated parameter, the 95% CI, months | Patients category   |                           |                      |
|-----------------------------------------|---------------------|---------------------------|----------------------|
|                                         | All, n=42*          | ADCC Non-responders, n=17 | ADCC Responders, n=8 |
| OS<br>Median<br>95% CI                  | 4.06<br>(3.06-5.58) | 3.27<br>(2.66-10.2)       | 4.63<br>(3.88-NA&)   |
| PFS<br>Median<br>95% CI                 | 1.77<br>(1.68-3.45) | 1.71<br>(1.61-3.45)       | 3.61<br>(3.45-NA&)   |

\*Two patients did not have complete records for OS and PFS estimation. &The upper bound has not been reached.

**Supplemental Table 1.** Statistical parameter estimates for OS and PFS for patients that had ADCC performed and for those ADCC was not performed.
